# Supplementary material for: HIV-Associated Apathy/Depression and Neurocognitive Impairments Reflect Persistent Dopamine Deficits
Source: MDPI journal article supplement (doi:10.3390/cells10082158), 2021-08-21
Supplement: s1 [file s1]

**Table S1.** Basal Dopamine (DA) values reported by individual manuscript.

| Reported DA Concentration            | Average DA Concentration (ng/g; X ± SEM) | Species | Sex           | Age          | Reference                     |
|--------------------------------------|------------------------------------------|---------|---------------|--------------|-------------------------------|
| Amygdala, HPLC                       |                                          |         |               |              |                               |
| 2.17 nmol/g                          | 332.4                                    | Primate | Male          |              | Elchisak et al., 1983 [39]    |
| 1.88 ± 0.144 ng/mg                   | 1880 ± 144                               | Rat     | Male          |              | Bradbury et al., 1985 [40]    |
| 0.11 ± 0.037 pmol/mg                 | 16.85 ± 5.63                             | Human   | Male & Female | 57-82 Years  | Ebinger et al., 1987 [41]     |
| 0.19 ± 0.03 ng/mg                    | 190 ± 30                                 | Rat     | Male          |              | Carvalho et al., 2005 [42]    |
| 16 ± 6.44 ng/mg                      | 16000 ± 6440                             | Mouse   | Male & Female | 2-6 Months   | Fadok et al., 2010 [43]       |
| Amygdala, Microdialysis              |                                          |         |               |              |                               |
| 0.15 ± 0.02 fmol/μL                  | 0.023 ± 0.003                            | Rat     | Male          |              | Inglis & Moghaddam, 1999 [44] |
| 0.785 ± 0.257                        | 0.122 ± 0.058                            | Rat     | Male          |              | Weiss et al., 2000 [45]       |
| 0.9 ± 0.45 pg/10 μL                  | 0.09 ± 0.046                             | Rat     | Male          | 4-5 Months   | Tor-Agbidye et al., 2001 [46] |
| 0.667 ± 0.31 pg/mL                   | 0.0007 ± 0.0003                          | Rat     | Male          | 9 Weeks      | Adachi et al., 2013 [47]      |
| Caudate, HPLC                        |                                          |         |               |              |                               |
| 58.2 nmol/g                          | 8915.1                                   | Primate | Male          |              | Elchisak et al., 1983 [39]    |
| 20.32 ± 7.66 pmol/mg                 | 3113 ± 1773                              | Human   | Male & Female | 57-82 Years  | Ebinger et al., 1987 [41]     |
| 10.9 ± 0.67 μg/g                     | 10900 ± 670                              | Sheep   | Female        |              | Juorio & Chedrese, 1990 [48]  |
| 3.1 ± 0.8 ng/mg                      | 3100 ± 800                               | Human   | Male & Female | 40.4 Years   | Davis & Sparks, 1995 [49]     |
| 3.43 ± 0.22 ng/mg                    | 3430 ± 220                               | Human   | Male & Female | 74 ± 2 Years | Wilson et al., 1996 [50]      |
| 1905 ± 195                           | 1905 ± 195                               | Human   | Male & Female | 35-78 Years  | Mushoff et al., 2000 [51]     |
| 127 ± 6.6 ng/mg                      | 12700 ± 6600                             | Primate | Male & Female |              | Elsworth et al., 2008 [52]    |
| 4833 ± 531 ng/g                      | 4833 ± 531                               | Human   | Male & Female | 80.6 Years   | Rajput et al., 2008 [53]      |
| 3.9 ± 0.345                          | 7.94 ± 16.553                            | Human   | Male & Female | 35-66 Years  | Kumar et al., 2009 [28]       |
| 2969 ± 803 fmol/mg                   | 455 ± 123                                | Human   |               | 74 ± 2 Years | Goldstein et al., 2011 [54]   |
| Caudate, Microdialysis               |                                          |         |               |              |                               |
| 21.5 ± 0.4% fmol/min                 | 2.19 ± 0.009%                            | Rat     | Female        | Adult        | Robinson & Camp, 1990 [55]    |
| 1.68 ± 0.21 fmol/μL                  | 0.257 ± 0.032                            | Rat     | Male          |              | Inglis & Moghaddam, 1999 [44] |
| 1.7 ± 0.165 nM                       | 0.18 ± 0.005                             | Mouse   | Male          | 8-16 Weeks   | Bosse & Mathews, 2011 [56]    |
| Frontal Cortex, HPLC                 |                                          |         |               |              |                               |
| 0.098 nmol/g                         | 14.94                                    | Primate | Male          |              | Elchisak et al., 1983 [39]    |
| 0.053 ± 0.025 ug/g                   | 52.5 ± 25                                | Rat     | Male & Female | 150 Days     | Lucas & McMillen, 2002 [57]   |
| 0.08 ± 0.015 ng/mg                   | 80 ± 15                                  | Rat     | Male          |              | Carvalho et al., 2005 [42]    |
| 0.92 ± 0.09                          | 920 ± 90                                 | Primate | Male & Female |              | Elsworth et al., 2008 [52]    |
| 210.2 ± 14.8 fmol/mg                 | 32.2 ± 2.27                              | Rat     | Female        | 8-10 Weeks   | Wisman et al., 2008 [58]      |
| 2.056 ± 0.166 log <sub>10</sub> pg/g | 0.118 ± 0.056                            | Human   | Male & Female | 35-66 Years  | Kumar et al., 2009 [28]       |
| 83 ± 63 fmol/mg                      | 12.71 ± 9.65                             | Human   |               | 74 ± 2 Years | Goldstein et al., 2011 [54]   |
| 215 ± 45 pg/mg                       | 215 ± 45                                 | Rat     | Male          |              | Bromek et al., 2011 [59]      |
| 0.475 ± 0.084 ng/mg                  | 475 ± 84                                 | Rat     | Male          | 78 Days      | Choi et al., 2012 [60]        |
| 113.83 ± 60.97 ng/g                  | 113.83 ± 60.97                           | Rat     | Male & Female |              | Hu et al., 2014 [61]          |
| 291.7 ± 55.4 pg/mg                   | 291.7 ± 55.4                             | Rat     | Male          |              | Rysz et al., 2015 [62]        |
| Frontal Cortex, Microdialysis        |                                          |         |               |              |                               |

|                                  |                |         |               |             |                                    |
|----------------------------------|----------------|---------|---------------|-------------|------------------------------------|
| 2.7 ± 0.5 nM                     | 0.41 ± 0.08    | Rat     | Male          |             | Moghaddam & Bunney, 1989 [63]      |
| 2.55 ± 0.2 nM                    | 0.391 ± 0.03   | Rat     | Female        |             | Maisonneuve et al., 1991 [64]      |
| 0.23 ± 0.03 fmol/ µL             | 0.035 ± 0.005  | Rat     | Male          |             | Inglis & Moghaddam, 1999 [44]      |
| 0.44 ± 0.09 pg/6 µL              | 0.074 ± 0.015  | Rat     | Female        |             | Shoblock et al., 2003 [65]         |
| Nucleus Accumbens, HPLC          |                |         |               |             |                                    |
| 14.93 ± 3.393 pmol/mg            | 2287 ± 519.7   | Human   | Male & Female | 57-82 Years | Ebinger et al., 1987 [41]          |
| 622 ± 97 ng/g                    | 622 ± 97       | Human   | Male & Female | 35-78 Years | Mushoff et al., 2000 [51]          |
| 48.5 ± 1.55 µg/g                 | 4850 ± 1550    | Rat     | Male & Female | 150 Days    | Lucas & McMillen, 2002 [57]        |
| 10.8 ± 0.9 ng/mg                 | 10800 ± 900    | Rat     | Male          |             | Carvalho et al., 2005 [42]         |
| 75.7 ± 6 ng/mg                   | 75700 ± 6000   | Primate | Male & Female |             | Elsworth et al., 2008 [52]         |
| 71.5 ± 4.64 ng/mg                | 71500 ± 4640   | Mouse   | Male & Female | 2-6 Months  | Fadok et al., 2010 [43]            |
| 8700 ± 50 ng/g                   | 8700 ± 50      | Rat     | Male          |             | Bromek et al., 2011 [59]           |
| 45.51 ± 6.13 ng/mg               | 45510 ± 6130   | Rat     | Male          | 78 Days     | Choi et al., 2012 [60]             |
| 75 ± 4 ng/mg                     | 75000 ± 4000   | Rat     |               |             | Salvatore et al., 2012 [66]        |
| 4535.8 ± 251.4 pg/mg             | 4535.8 ± 251.4 | Rat     | Male          | 3-28 Months | Rysz et al., 2015 [62]             |
| 125 ± 5 ng/mg                    | 125000 ± 25000 | Mouse   |               | 12-15 Weeks | Winner et al., 2017 [67]           |
| 4.77 ± 1.15 ng/mg                | 4770 ± 1150    | Mouse   | Male          |             | Bergamini et al., 2018 [68]        |
| Nucleus Accumbens, Microdialysis |                |         |               |             |                                    |
| 8 ± 1 pg/20 µL                   | 0.4 ± 0.051    | Rat     | Male          |             | Hernandez & Hoebel, 1988 [69]      |
| 17.4 ± 1.2 nM                    | 2.67 ± 0.18    | Rat     | Male          |             | Moghaddam & Bunney, 1989 [63]      |
| 9.838 ± 2.828 nM                 | 1.505 ± 0.432  | Rat     | Male          |             | Pettit et al., 1990 [70]           |
| 15 ± 0.4% fmol/min               | 1.53 ± 0.006%  | Rat     | Female        | Adult       | Robinson & Camp, 1990 [55]         |
| 0.01 ± 0.001 pmol/20 µL          | 0.08 ± 0.008   | Rat     | Male          | Adult       | Pothos et al., 1991 [71]           |
| 14.27 ± 1.1 nM                   | 2.19 ± 0.17    | Rat     | Female        |             | Maisonneuve et al., 1991 [64]      |
| 4.05 ± 0.2 nM                    | 0.62 ± 0.03    | Rat     | Male          |             | Parsons & Justice, 1992 [72]       |
| 10.02 ± 1.45 nM                  | 1.53 ± 0.22    | Rat     | Female        |             | Maisonneuve & Glick, 1992 [73]     |
| 0.171 ± 0.085 pmol/20 µL         | 0.655 ± 0.326  | Rat     | Female        |             | Chapman et al., 1992 [74]          |
| 58.7 ± 6.9 fmol/40 µL            | 0.23 ± 0.026   | Rat     | Male          |             | Chen et al., 1993 [75]             |
| 10.855 ± 1.675 nM                | 1.665 ± 0.255  | Rat     | Male & Female | 90-120Days  | Blanchard et al., 1993 [76]        |
| 0.14 ± 0.005 pmol/25 µL          | 0.86 ± 0.012   | Rat     | Male          |             | Anagnostakis & Spyraiki, 1994 [77] |
| 3.275 ± 0.408 nM                 | 0.5 ± 0.0615   | Rat     | Male          | 90-150 Days | Hemby et al., 1995 [78]            |
| 0.0375 ± 0.003 pmol/ 15 µL       | 0.379 ± 0.025  | Rat     | Male & Female | Adults      | Blanchard & Glick, 1995 [79]       |
| 32 ± 4 fmol/20 µL                | 1.2 ± 0.15     | Rat     | Female        |             | Campbell & McBride, 1995 [80]      |
| 3.45 ± 0.64 nM                   | 0.528 ± 0.098  | Rat     | Male          |             | Weiss et al., 1996 [81]            |
| 0.0197 ± 0.003 pmol/20 µL        | 0.151 ± 0.023  | Rat     | Female        |             | Pearl et al., 1996 [82]            |
| 73 ± 16 fmol/20 µL               | 0.559 ± 0.1    | Rat     | Female        | Adult       | Kohl et al., 1998 [83]             |

|                          |                |       |               |                   |                                    |
|--------------------------|----------------|-------|---------------|-------------------|------------------------------------|
| 1.428 ± 0.208 fmol/μL    | 0.219 ± 0.032  | Rat   | Male          |                   | Yan, 1999 [84]                     |
| 1.24 ± 0.44 fmol/μL      | 0.189 ± 0.067  | Rat   | Male          |                   | Inglis & Moghaddam, 1999 [44]      |
| 0.01 ± 0.002 pmol/10 μL  | 0.15 ± 0.03    | Rat   | Female        |                   | Maisonneuve & Glick, 1999 [85]     |
| 2.375 ± 0.685 nM         | 0.364 ± 0.105  | Rat   | Male          |                   | Weiss et al., 2000 [45]            |
| 8.8 ± 0.4 nM             | 1.3 ± 0.06     | Rat   | Male          |                   | Yim & Gonzales, 2000 [86]          |
| 0.006 ± 0.003 pmol/10 μL | 0.09 ± 0.05    | Rat   | Female        |                   | Szumliniski et al., 2000 [87]      |
| 0.015 ± 0 pmol/10 μL     | 0.23 ± 0       | Rat   | Female        |                   | Szumliniski et al., 2000 [88]      |
| 10.3 ± 1.8 nM            | 1.58 ± 0.28    | Rat   | Female        |                   | Johnson et al., 2000 [89]          |
| 66.8 ± 3.3 fmol/50 μL    | 0.2 ± 0.01     | Rat   | Male          |                   | Fadda et al., 2003 [90]            |
| 0.014 ± 0.003 pmol/10 μL | 0.22 ± 0.047   | Rat   | Female        |                   | Steinmiller et al., 2003 [91]      |
| 2.46 ± 0.39 pg/10 μL     | 0.25 ± 0.04    | Rat   | Female        |                   | Shoblock et al., 2003 [65]         |
| 1.565 ± 0.22 pg/20 μL    | 0.078 ± 0.011  | Rat   | Male & Female | 10 Days           | Kosten et al., 2003 [92]           |
| 4.267 ± 1.867 nM         | 1.557 ± 0.287  | Rat   | Male          | 90-150 Days       | Smith et al., 2006 [93]            |
| 0.023 ± 0.002 pmol/25 μL | 0.14 ± 0.012   | Rat   | Female        | 3 Months          | Geiger et al., 2009 [94]           |
| 1.14 ± 0.14 nM           | 0.175 ± 0.021  | Rat   | Male          |                   | Borgkvist et al., 2012 [95]        |
| 0.02 ± 0.004 pmol/10 μL  | 0.31 ± 0.06    | Rat   | Female        |                   | McCallum et al., 2012 [96]         |
| 0.59 ± 0.163 pg/ μL      | 0.593 ± 0.157  | Rat   | Male          | 9 Weeks           | Adachi et al., 2013 [47]           |
| 4.18 ± 1.025 pg/40 μL    | 0.105 ± 0.026  | Rat   | Male & Female | Early Adolescence | Grotewold et al., 2014 [97]        |
| 6.445 ± 1.245 pg/10 min  | 0.43 ± 0.083   | Rat   | Male & Female | 50-55 Days        | Cummings et al., 2014 [98]         |
| 0.022 ± 0.001 pmol/ μL   | 3.31 ± 0.18    | Rat   | Female        |                   | Eggan & McCallum, 2016 [99]        |
| Nucleus Accumbens, FSCV  |                |       |               |                   |                                    |
| 20.35 ± 0.265 nM         | 3.12 ± 0.04    | Rat   | Male          |                   | Roitman et al., 2008 [100]         |
| 20-30 nM                 | 3.1 – 4.6      | Rat   | Male          |                   | Owesson-White et al., 2012 [101]   |
| ~49 nM                   | 7.5            | Rat   | Male          |                   | Dreyer et al., 2016 [102]          |
| 90 ± 9 nM                | 14 ± 1.4       | Mouse |               |                   | Atcherley et al., 2015 [103]       |
| 41 ± 13 nM               | 6.3 ± 2        | Rat   | Male          |                   | Johnson et al., 2018 [104]         |
| Striatum, HPLC           |                |       |               |                   |                                    |
| 0.64 ± 0.05 nmol/mg      | 98035 ± 7659   | Mouse | Male          | 7 Weeks           | Kita et al., 2000 [105]            |
| 11500 ± 1500 pg/mg       | 11500 ± 1500   | Mouse | Male          | 9-19 Weeks        | Bałkowiec-Iskra et al., 2007 [106] |
| 29.175 ± 21 ng/mg        | 279175 ± 21000 | Mouse | Male          | 9-16 Weeks        | Petzinger et al., 2007 [107]       |
| 11.3 ± 1.562 nmol/g      | 1731 ± 239.384 | Rat   | Female        | 2-3 Months        | Swiercz et al., 2009 [108]         |
| 9800 ± 130 pg/mg         | 9800 ± 130     | Rat   | Male          |                   | Bromek et al., 2011 [59]           |
| 165 ± 13 ng/mg           | 165000 ± 13000 | Rat   |               |                   | Salvatore et al., 2012 [66]        |
| 1901.4 ± 64.78 ng/g      | 1901.4 ± 64.78 | Rat   | Male & Female |                   | Hu et al., 2014 [61]               |
| 5 ± 0.6 ng/mg            | 5000 ± 60      | Rat   | Male          | 3-20.5 Months     | Villar-Cheda et al., 2014 [109]    |
| 6553.8 ± 331.6 ng/g      | 6553.8 ± 331.6 | Rat   | Male          |                   | Rysz et al., 2015 [62]             |
| 1280 ± 90 ng/g           | 1280 ± 90      | Rat   | Male          |                   | Nikishina et al., 2016 [110]       |

|                                       |                |                  |               |                |                                   |
|---------------------------------------|----------------|------------------|---------------|----------------|-----------------------------------|
| 225 ± 30 ng/mg                        | 225000 ± 30000 | Mouse            |               | 3-28 Months    | Winner et al., 2017 [67]          |
| 4.55 ± 0.45<br>ng/mg                  | 4550 ± 450     | Rat and<br>Mouse | Male          | 3.5-4.5 Months | Garrido-Gil et al., 2018 [111]    |
| Striatum, Microdialysis               |                |                  |               |                |                                   |
| 24 ± 1.6 nM                           | 3.676 ± 0.25   | Rat              | Female        |                | Maisonneuve et al., 1991 [64]     |
| 14.49 ± 1.9 nM                        | 2.22 ± 0.29    | Rat              | Female        |                | Maisonneuve & Glick, 1992<br>[73] |
| 0.105 ± 0.025<br>pmol/20 min          | 0.402 ± 0.096  | Rat              | Female        |                | Chapman et al., 1992 [74]         |
| 17.435 ± 2.81 nM                      | 2.671 ± 0.43   | Rat              | Male & Female | 90-120 Days    | Blanchard et al., 1993 [76]       |
| 0.052 ± 0.006<br>pmol/15 µL           | 0.521 ± 0.061  | Rat              | Male & Female | Adult          | Blanchard & Glick, 1995 [79]      |
| 0.026 ± 0.007<br>pmol/20 µL           | 0.196 ± 0.054  | Rat              | Female        |                | Pearl et al., 1996 [82]           |
| 0.026 ± 0.003<br>pmol/10 µL           | 0.4 ± 0.038    | Rat              | Female        |                | Maisonneuve & Glick, 1999<br>[85] |
| 5 fmol/ µL                            | 0.77           | Primate          | Male          |                | Bradberry, 2000 [112]             |
| 18 ± 3 nM                             | 2.76 ± 0.46    | Rat              | Male          |                | Shou et al., 2006 [113]           |
| 4 nM                                  | 0.61           | Mouse            | Male          | 4 or 10 Weeks  | Zhang et al., 2009 [114]          |
| Ventral Tegmental Area, HPLC          |                |                  |               |                |                                   |
| 9.2 ± 1.4 ng/mg                       | 9200 ± 1400    | Rat              |               |                | Salvatore et al., 2012 [66]       |
| Ventral Tegmental Area, Microdialysis |                |                  |               |                |                                   |
| 46.5 ± 3.9 fmol/40 µL                 | 0.178 ± 0.015  | Rat              | Male          |                | Chen et al., 1993 [75]            |
| 42 ± 8 fmol/20 µL                     | 0.322 ± 0.061  | Rat              | Female        | Adult          | Kohl et al., 1998 [83]            |
